# Supplementary material for: Sequence diversity of cytotoxic T cell antigens and satellite marker analysis of Theileria parva informs the immunization against East Coast fever in Rwanda
Source: PubMed Central journal article supplement (PMC7487574; doi:10.1186/s13071-020-04322-9), 2020-09-07
Supplement: 13071_2020_4322_MOESM2_ESM.pdf [file 13071_2020_4322_MOESM2_ESM.pdf]

## Additional file 2: Figure S1

|                      |   |       |       |       |      |       |       |       |     |     |        |      |       |        |      |       |       |       |      |     |    |
|----------------------|---|-------|-------|-------|------|-------|-------|-------|-----|-----|--------|------|-------|--------|------|-------|-------|-------|------|-----|----|
| JF451938. Muguga     | 1 | MATSI | AFAAD | PGFCY | FLLI | PGDSK | PIFFK | NDGDK | FLR | VGY | PKVKEE | EMAT | KFNRL | PKGVEI | PAPP | GVKPE | APTPT | PTTIT | PSVP | PPT | 90 |
| JF451939. Kiambu     | 1 | MATSI | AFAAD | PGFCY | FLLI | PGDSK | PIFFK | NDGDK | FLR | VGY | PKVKEE | EMAT | KFNRL | PKGVEI | PAPP | GVKPE | APTPT | PTTIT | PSVP | PPT | 90 |
| JF451940. Serengeti  | 1 | MATSI | AFAAD | PGFCY | FLLI | PGDSK | PIFFK | NDGDK | FLR | VGY | PKVKEE | EMAT | KFNRL | PKGVEI | PAPP | GVKPE | APTPT | PTTIT | PSVP | PPT | 90 |
| Nyakizu B66          | 1 | MATSI | AFAAD | PGFCY | FLLI | PGDSK | PIFFK | NDGDK | FLR | VGY | PKVKEE | EMAT | KFNRL | PKGVEI | PAPP | GVKPE | APTPT | PTTIT | PSVP | PPT | 90 |
| RW1                  | 1 | MATSI | AFAAD | PGFCY | FLLI | PGDSK | PIFFK | NDGDK | FLR | VGY | PKVKEE | EMAT | KFNRL | PKGVEI | PAPP | GVKPE | APTPT | PTTIT | PSVP | PPT | 90 |
| RW3                  | 1 | MATSI | AFAAD | PGFCY | FLLI | PGDSK | PIFFK | NDGDK | FLR | VGY | PKVKEE | EMAT | KFNRL | PKGVEI | PAPP | GVKPE | APTPT | PTTIT | PSVP | PPT | 90 |
| RW4                  | 1 | MATSI | AFAAD | PGFCY | FLLI | PGDSK | PIFFK | NDGDK | FLR | VGY | PKVKEE | EMAT | KFNRL | PKGVEI | PAPP | GVKPE | APTPT | PTTIT | PSVP | PPT | 90 |
| RW5                  | 1 | MATSI | AFAAD | PGFCY | FLLI | PGDSK | PIFFK | NDGDK | FLR | VGY | PKVKEE | EMAT | KFNRL | PKGVEI | PAPP | GVKPE | APTPT | PTTIT | PSVP | PPT | 90 |
| RW6                  | 1 | MATSI | AFAAD | PGFCY | FLLI | PGDSK | PIFFK | NDGDK | FLR | VGY | PKVKEE | EMAT | KFNRL | PKGVEI | PAPP | GVKPE | APTPT | PTTIT | PSVP | PPT | 90 |
| RW7                  | 1 | MATSI | AFAAD | PGFCY | FLLI | PGDSK | PIFFK | NDGDK | FLR | VGY | PKVKEE | EMAT | KFNRL | PKGVEI | PAPP | GVKPE | APTPT | PTTIT | PSVP | PPT | 90 |
| RW8                  | 1 | MATSI | AFAAD | PGFCY | FLLI | PGDSK | PIFFK | NDGDK | FLR | VGY | PKVKEE | EMAT | KFNRL | PKGVEI | PAPP | GVKPE | APTPT | PTTIT | PSVP | PPT | 90 |
| RW9                  | 1 | MATSI | AFAAD | PGFCY | FLLI | PGDSK | PIFFK | NDGDK | FLR | VGY | PKVKEE | EMAT | KFNRL | PKGVEI | PAPP | GVKPE | APTPT | PTTIT | PSVP | PPT | 90 |
| RW13                 | 1 | MATSI | AFAAD | PGFCY | FLLI | PGDSK | PIFFK | NDGDK | FLR | VGY | PKVKEE | EMAT | KFNRL | PKGVEI | PAPP | GVKPE | APTPT | PTTIT | PSVP | PPT | 90 |
| RW14                 | 1 | MATSI | AFAAD | PGFCY | FLLI | PGDSK | PIFFK | NDGDK | FLR | VGY | PKVKEE | EMAT | KFNRL | PKGVEI | PAPP | GVKPE | APTPT | PTTIT | PSVP | PPT | 90 |
| RW17                 | 1 | MATSI | AFAAD | PGFCY | FLLI | PGDSK | PIFFK | NDGDK | FLR | VGY | PKVKEE | EMAT | KFNRL | PKGVEI | PAPP | GVKPE | APTPT | PTTIT | PSVP | PPT | 90 |
| Gikongoro RW1        | 1 | MATSI | AFAAD | PGFCY | FLLI | PGDSK | PIFFK | NDGDK | FLR | VGY | PKVKEE | EMAT | KFNRL | PKGVEI | PAPP | GVKPE | APTPT | PTTIT | PSVP | PPT | 90 |
| RW19                 | 1 | MATSI | AFAAD | PGFCY | FLLI | PGDSK | PIFFK | NDGDK | FLR | VGY | PKVKEE | EMAT | KFNRL | PKGVEI | PAPP | GVKPE | APTPT | PTTIT | PSVP | PPT | 90 |
| RW10                 | 1 | MATSI | AFAAD | PGFCY | FLLI | PGDSK | PIFFK | NDGDK | FLR | VGY | PKVKEE | EMAT | KFNRL | PKGVEI | PAPP | GVKPE | APTPT | PTTIT | PSVP | PPT | 90 |
| RW11                 | 1 | MATSI | AFAAD | PGFCY | FLLI | PGDSK | PIFFK | NDGDK | FLR | VGY | PKVKEE | EMAT | KFNRL | PKGVEI | PAPP | GVKPE | APTPT | PTTIT | PSVP | PPT | 90 |
| JF451975 Chitongo Z2 | 1 | MATSI | AFAAD | PGFCY | FLLI | PGDSK | PIFFK | NDGDK | FLR | VGY | PKVKEE | EMAT | KFNRL | PKGVEI | PAPP | GVKPE | APTPT | PTTIT | PSVP | PPT | 90 |
| RW12                 | 1 | MATSI | AFAAD | PGFCY | FLLI | PGDSK | PIFFK | NDGDK | FLR | VGY | PKVKEE | EMAT | KFNRL | PKGVEI | PAPP | GVKPE | APTPT | PTTIT | PSVP | PPT | 90 |
| RW15                 | 1 | MATSI | AFAAD | PGFCY | FLLI | PGDSK | PIFFK | NDGDK | FLR | VGY | PKVKEE | EMAT | KFNRL | PKGVEI | PAPP | GVKPE | APTPT | PTTIT | PSVP | PPT | 90 |
| RW16                 | 1 | MATSI | AFAAD | PGFCY | FLLI | PGDSK | PIFFK | NDGDK | FLR | VGY | PKVKEE | EMAT | KFNRL | PKGVEI | PAPP | GVKPE | APTPT | PTTIT | PSVP | PPT | 90 |
| RW18                 | 1 | MATSI | AFAAD | PGFCY | FLLI | PGDSK | PIFFK | NDGDK | FLR | VGY | PKVKEE | EMAT | KFNRL | PKGVEI | PAPP | GVKPE | APTPT | PTTIT | PSVP | PPT | 90 |

Additional file 2: Figure S2

CTL 01 CTL 02 CTL 03

|                       |   |                                                                                           |    |
|-----------------------|---|-------------------------------------------------------------------------------------------|----|
| JF451861 muguga 73    | 1 | MKLAARLISLYFIITLHSPVLGGNSHEELKKLGMLEGGDFDRDALFKSSHGMGKVGKRYGLKTPPKVDKVLADLETFLGKHGLGGISK  | 90 |
| JF451862 serengeti 69 | 1 | MKLAARLISLYFIITLHSPVLGGNSHEELKKLGMLEGGDFDRDALFKSSHGMGKVGKRYGLKTPPKVDKVLADLETFLGKHGLGGISK  | 90 |
| Nyakizu T2            | 1 | MKLAARLISLYFIITLHSPVLGGNSHEELKKLGMLEGGDFDRDALFKSSHGMGKVGKRYGLKTPPKVDKVLADLETFLGKHGLGGISK  | 90 |
| RW2                   | 1 | MKLAARLISLYFIITLHSPVLGGNSHEELKKLGMLEGGDFDRDALFKSSHGMGKVGKRYGLKTPPKVDKVLADLETFLGKHGLGGISK  | 90 |
| RW17                  | 1 | MKLAARLISLYFIITLHSPVLGGNSHEELKKLGMLEGGDFDRDALFKSSHGMGKVGKRYGLKTPPKVDKVLADLETFLGKHGLGGISK  | 90 |
| RW9                   | 1 | MKLAARLISLYFIITLHSPVLGGNSHEELKKLGMLEGGDFDRDALFKSSHGMGKVGKRYGLKTPPKVDKVLADLETFLGKHGLGGISK  | 90 |
| RW13                  | 1 | MKLAARLISLYFIITLHSPVLGGNSHEELKKLGMLEGGDFDRDALFKSSHGMGKVGKRYGLKTPPKVDKVLADLETFLGKHGLGGISK  | 90 |
| RW1                   | 1 | MKLAARLISLYFIITLHSPVLGGNSHEELDTLGMLEGGDFDRDALFKSSHGMGKVGKRYGLKTPPKVEKVLTDLAQLFTKGLGAGVVK  | 90 |
| RW8                   | 1 | MKLAARLISLYFIITLHSPVLGGNSHEELKKLGMVEGEGDFDKEKLFKSSKSMGIVGRNHGLKPKPRLESWFEDLEKLFGKHGLGGISK | 90 |
| RW3                   | 1 | MKLAARLISLYFIITLHSPVLGGNSHEELKKLGMVEGEGDFDKEKLFKSSKSMGIVGRNHGLKPKPRLESWFEDLEKLFGKHGLGGISK | 90 |
| RW16                  | 1 | MKLAARLISLYFIITLHSPVLGGNSHEELKKLGMVEGEGDFDKEKLFKSSQSMGIVGRNHGLKPKPRLESWFEDLEKLFGKHGLGGISK | 90 |
| Gikongoro RW1         | 1 | MKLAARLISLYFIITLHSPVLGGNSDEELDKLGMLEGGDFDRDALFKSSHGMGKVGKRYGLKTPPKVDKVLADLETFLGKLGLAGISK  | 90 |
| JF451880 kiambu 5     | 1 | MKLAARLISLYFIITLHSPVLGGNSDEELNKLGMLEGGDFDRDALFKSSHGMGKVGKRYGLKTPPKVDKVLADLETFLGKHGLGGISK  | 90 |
| RW14                  | 1 | MKLAARLISLYFIITLHSPVLGGNSDEELNKLGMLEGGDFDRDALFKSSHGMGKVGKRYGLKTPPKVDKVLADLETFLGKHGLGGISK  | 90 |
| RW19                  | 1 | MKLAARLISLYFIITLHSPVLGGNSDEELNKLGMVEGEGDFDRNLTKSSHGMGKVGKRYGLKTPPKVDKVLADLETFLGKHGLGGISK  | 90 |
| RW18                  | 1 | MKLAARLISLYFIITLHSPVLGGNSDEELNKLGMVEGEGDFDKTLFKSSHGMGKIVGRNHGLKPRTRLEKVFKDLEKLFGKHGLAGIGK | 90 |
| RW5                   | 1 | MKLAARLISLYFIITLHSPVLGGNSDEELGYLGMVEGEGDFDKTLFKSSQSMGIVGRNHGLKPRTRLEKVFEDLEKLFGKHGLGGISK  | 90 |
| JF451884 chitongo Z2  | 1 | MKLAARLISLYFIITLHSPVLGGNSDEELDTLGMLEGGDFDRDALFKSSHGMGKIVGRNHGLKPRTRLEKVFEDLEKLFGKHGLGGISK | 90 |
| RW6                   | 1 | MKLAARLISLYFIITLHSPVLGGNSDEELDTLGMLEGGDFDRDALFKSSHGMGKIVGRNHGLKPRTRLEKVFEDLEKLFGKHGLGGISK | 90 |
| RW11                  | 1 | MKLAARLISLYFIITLHSPVLGGNSDEELDTLGLLQKPKDKNRFLTSHGMGKIVGRNHGLKPRTRLEKVFEDLEKLFGKHGLGGISK   | 90 |
| RW4                   | 1 | MKLAARLISLYFIITLHSPVLGGNSDEELDTLGLLQKPKDKNRFLTSHGMGKIVGRNHGLKPRTRLEKVFEDLEKLFGKHGLGGISK   | 90 |
| RW10                  | 1 | MKLAARLISLYFIITLHSPVLGGNSDEELDTLGLLQKPKDKNRFLTSHGMGKIVGRNHGLKPRTRLEKVFEDLEKLFGKHGLGGISK   | 90 |
| RW12                  | 1 | MKLAARLISLYFIITLHSPVLGGNSDEELDTLGLLQKPKDKNRFLTSHGMGKIVGRNHGLKPRTRLEKVFEDLEKLFGKHGLGGISK   | 90 |
| RW7                   | 1 | MKLAARLISLYFIITLHSPVLGGNSDEELDTLGLLQKPKDKNRFLTSHGMGKIVGRNHGLKPRTRLEKVFEDLEKLFGKHGLGGISK   | 90 |
| RW15                  | 1 | MKLAARLISLYFIITLHSPVLGGNSDEELDTLGMLEGGDFDRDALFKSSHGMGKIVGRNHGLKPRTRLEKVFEDLEKLFGKHGLGGISK | 90 |

CTL 04 CTL 05 CTL 06

|                       |    |                                                                                         |     |
|-----------------------|----|-----------------------------------------------------------------------------------------|-----|
| JF451861 muguga 73    | 91 | DCLKCFAQSLVCLVIMKCRGACLKGPCTDDCQNCIFDRNCKSALLECIKGTSPINPCKVKEDYLKYKFPETDEDESTKKGGEASGTS | 174 |
| JF451862 serengeti 69 | 91 | DCLKCFAQSLVCLVIMKCRGACLKGPCTDDCQNCIFDRNCKSALLECIKGTSPINPCKVKEDYLKYKFPETDEDESTKKGGEASGTS | 174 |
| Nyakizu T2            | 91 | DCLKCFAQSLVCLVIMKCRGACLKGPCTDDCQNCIFDRNCKSALLECIKGTSPINPCKVKEDYLKYKFPETDEDESTKKGGEASGTS | 174 |
| RW2                   | 91 | DCLKCFAQSLVCLVIMKCRGACLKGPCTDDCQNCIFDRNCKSALLECIKGTSPINPCKVKEDYLKYKFPETDEDESTKKGGEASGTS | 174 |
| RW17                  | 91 | DCLKCFAQSLVCLVIMKCRGACLKGPCTDDCQNCIFDRNCKSALLECIKGTSPINPCKVKEDYLKYKFPETDEDESTKKGGEASGTS | 174 |
| RW9                   | 91 | DCLKCFAQSLVCLVIMKCRGACLKGPCTDDCQNCIFDRNCKYALLECIKGTSPINPCKVKEDYLKYKFPETDEDESTKKGGEASGTS | 174 |
| RW13                  | 91 | DCLKCFAQSLVCLVIMKCRGACLKGPCTDDCQNCIFDRNCKSALLECIKGTSPINPCKVKEDYLKYKFPETDEDESTKKGGEASGTS | 174 |
| RW1                   | 91 | DCLKCFAQSLVCLVIMKCRGACLKGPCTDDCQNCIFDRNCKSALLECIKGTSPINPCKVKEDYLKYKFPETDEDESTKKGGEASGTS | 174 |
| RW8                   | 91 | NCLTQFVQSLMCMVIMKCRGACLKGPCTDDCQNCIFDRNCKSALLECIKGTSPINPCKVKEDYLKYKFPETDEDESTKKGGEASGTS | 174 |
| RW3                   | 91 | NCLTQFVQSLMCMVIMKCRGACLKGPCTDDCQNCIFDRNCKSALLECIKGTSPINPCKVKEDYLKYKFPETDEDESTKKGGEASGTS | 174 |
| RW16                  | 91 | NCLTQFVQSLMCMVIMKCRGACLKGPCTDDCQNCIFDRNCKSALLECIKGTSPINPCKVKEDYLKYKFPETDEDESTKKGGEASGTS | 174 |
| Gikongoro RW1         | 91 | DCLKCFAQSLVCLVIMKCRGACLKGPCTDDCQNCIFDRNCKSALLECIKGTSPINPCKVKEDYLKYKFPETDEDESTKKGGEASGTS | 174 |
| JF451880 kiambu 5     | 91 | DCLKCFAQSLVCLVIMKCRGACLKGPCTDDCQNCIFDRNCKSALLECIKGTSPINPCKVKEDYLKYKFPETDEDESTKKGGEASGTS | 174 |
| RW14                  | 91 | DCLKCFAQSLVCLVIMKCRGACLKGPCTDDCQNCIFDRNCKSALLECIKGTSPINPCKVKEDYLKYKFPETDEDESTKKGGEASGTS | 174 |
| RW19                  | 91 | DCLKCFAQSLMCMVIMKCRGACLKGPCTDDCQNCIFDRNCKSALLECIKGTSPINPCKVKEDYLKYKFPETDEDESTKKGGEASGTS | 174 |
| RW18                  | 91 | NCLTQFVQSLMCMVIMKCRGACLKGPCTDDCQNCIFDRNCKSALLECIKGTSPINPCKVKEDYLKYKFPETDEDESTKKGGEASGTS | 174 |
| RW5                   | 91 | NCLTQFVQSLMCMVIMKCRGACLKGPCTDDCQNCIFDRNCKSALLECIKGTSPINPCKVKEDYLKYKFPETDEDESTKKGGEASGTS | 174 |
| JF451884 chitongo Z2  | 91 | KCLELFAASIKCVSIHCKGACLKGPCTDDCQNCIFDRNCKSALLECIKGTSPINPCKVKEDYLKYKFPETDEDESTKKGGEASGTS  | 174 |
| RW6                   | 91 | KCLELFAASIKCVSIHCKGACLKGPCTDDCQNCIFDRNCKSALLECIKGTSPINPCKVKEDYLKYKFPETDEDESTKKGGEASGTS  | 174 |
| RW11                  | 91 | KCLELFAASIKCVSIHCKGACLKGPCTDDCQNCIFDRNCKSALLECIKGTSPINPCKVKEDYLKYKFPETDEDESTKKGGEASGTS  | 174 |
| RW4                   | 91 | KCLELFAASIKCVSIHCKGACLKGPCTDDCQNCIFDRNCKSALLECIKGTSPINPCKVKEDYLKYKFPETDEDESTKKGGEASGTS  | 174 |
| RW10                  | 91 | KCLELFAASIKCVSIHCKGACLKGPCTDDCQNCIFDRNCKSALLECIKGTSPINPCKVKEDYLKYKFPETDEDESTKKGGEASGTS  | 174 |
| RW12                  | 91 | KCLELFAASIKCVSIHCKGACLKGPCTDDCQNCIFDRNCKSALLECIKGTSPINPCKVKEDYLKYKFPETDEDESTKKGGEASGTS  | 174 |
| RW7                   | 91 | KCLELFAASIKCVSIHCKGACLKGPCTDDCQNCIFDRNCKSALLECIKGTSPINPCKVKEDYLKYKFPETDEDESTKKGGEASGTS  | 174 |
| RW15                  | 91 | KCLELFAASIKCVSIHCKGACLKGPCTDDCQNCIFDRNCKSALLECIKGTSPINPCKVKEDYLKYKFPETDEDESTKKGGEASGTS  | 174 |
